# Supplementary material for: Identification and validation of an anoikis-related genes signature for prognostic implication in papillary thyroid cancer
Source: publisher site journal article supplement (doi:10.18632/aging.205766), 2024-04-24
Supplement: Supplementary file [file aging-v16i8-205766-supplementary-material-SD2.pdf]

## SUPPLEMENTARY TABLES

**Supplementary Table 1. The results of univariate Cox regression analysis of the 64 ARGs.**

| Gene      | HR       | HR.95L   | HR.95H   | P-value   |
|-----------|----------|----------|----------|-----------|
| PDK4      | 0.813384 | 0.418117 | 1.582319 | 0.542944  |
| CXCL12    | 0.672002 | 0.341532 | 1.322236 | 0.249698  |
| TNFRSF10B | 1.618241 | 0.815094 | 3.212761 | 0.16893   |
| F10       | 0.678121 | 0.344754 | 1.333844 | 0.260432  |
| PRKCQ     | 0.371878 | 0.174224 | 0.793766 | 0.010558* |
| BLNK      | 1.730454 | 0.871564 | 3.435744 | 0.117085  |
| CEACAM6   | 1.135419 | 0.583849 | 2.208067 | 0.708219  |
| FN1       | 1.430055 | 0.727176 | 2.812329 | 0.299886  |
| ITGA2     | 1.289573 | 0.660118 | 2.519243 | 0.456675  |
| TIMP1     | 0.936598 | 0.482296 | 1.818835 | 0.846622  |
| CCND1     | 0.700209 | 0.359639 | 1.363293 | 0.294483  |
| PLAUR     | 1.334809 | 0.678455 | 2.626137 | 0.402929  |
| LGALS3    | 0.994759 | 0.512557 | 1.930607 | 0.987608  |
| SFN       | 1.436135 | 0.73027  | 2.824274 | 0.294188  |
| CLDN1     | 1.160057 | 0.596391 | 2.256459 | 0.661843  |
| CDKN1A    | 0.784467 | 0.403266 | 1.52601  | 0.474594  |
| PLAU      | 1.003439 | 0.517052 | 1.947368 | 0.991903  |
| BID       | 0.900536 | 0.463154 | 1.750962 | 0.757468  |
| FAS       | 0.817365 | 0.420266 | 1.589671 | 0.552373  |
| LAMB3     | 1.248822 | 0.639242 | 2.439696 | 0.515482  |
| CDH2      | 1.022473 | 0.526885 | 1.984208 | 0.947618  |
| SERPINA1  | 1.080092 | 0.555243 | 2.101063 | 0.820467  |
| MET       | 1.116252 | 0.573934 | 2.171015 | 0.745915  |
| INHBB     | 0.435113 | 0.215994 | 0.876521 | 0.01987*  |
| H19       | NA       | NA       | NA       | NA        |
| CRYAB     | 0.605292 | 0.30488  | 1.201714 | 0.151339  |
| IL1RAP    | 1.028818 | 0.529971 | 1.997215 | 0.933101  |
| LMO3      | 0.56777  | 0.285925 | 1.12744  | 0.105824  |
| CDH3      | 0.95003  | 0.489177 | 1.845052 | 0.879689  |
| TGFBR3    | 0.609496 | 0.30695  | 1.210246 | 0.15715   |
| COL13A1   | 0.840768 | 0.43232  | 1.63511  | 0.609305  |
| TNFRSF12A | 0.722052 | 0.370535 | 1.407043 | 0.338706  |
| TIAM1     | 1.151504 | 0.588941 | 2.251433 | 0.680073  |
| PRDM1     | 1.238724 | 0.636916 | 2.409165 | 0.528186  |
| S100A11   | 1.449379 | 0.736937 | 2.850583 | 0.28218   |
| SLPI      | 0.856398 | 0.441236 | 1.662191 | 0.646836  |
| CXCL14    | 0.677088 | 0.346172 | 1.324339 | 0.254593  |
| LTF       | 0.516769 | 0.252919 | 1.055873 | 0.070167  |
| CD36      | 0.41095  | 0.197321 | 0.855865 | 0.017512* |
| PAK3      | 0.769079 | 0.395404 | 1.495895 | 0.439216  |
| TDGF1     | 0.430439 | 0.206679 | 0.896448 | 0.024322* |
| PPARG     | 0.828337 | 0.425794 | 1.611445 | 0.579105  |
| CD151     | 1.047616 | 0.537916 | 2.040281 | 0.891207  |
| CRABP2    | 1.390912 | 0.706797 | 2.737189 | 0.339427  |

|         |          |          |          |           |
|---------|----------|----------|----------|-----------|
| DAPK2   | 0.871217 | 0.44879  | 1.691257 | 0.683753  |
| ITGA3   | 1.368697 | 0.6958   | 2.692343 | 0.36322   |
| MUC1    | 1.376781 | 0.700026 | 2.707791 | 0.354168  |
| S100A4  | 1.123145 | 0.577457 | 2.184502 | 0.732238  |
| ETV4    | 0.630625 | 0.320552 | 1.240635 | 0.181742  |
| NOX4    | 0.952772 | 0.490779 | 1.849662 | 0.88634   |
| KL      | 1.123588 | 0.577429 | 2.186328 | 0.731537  |
| SPP1    | 1.311797 | 0.671443 | 2.562857 | 0.427049  |
| TLE1    | 0.921292 | 0.474671 | 1.788143 | 0.808558  |
| CXCL8   | 1.015485 | 0.521409 | 1.977739 | 0.963962  |
| LGALS1  | 0.764104 | 0.392676 | 1.486861 | 0.428289  |
| MMP9    | 2.23077  | 1.092652 | 4.554361 | 0.027575* |
| EZH2    | 3.5077   | 1.593143 | 7.723072 | 0.00183*  |
| LPAR1   | 0.827049 | 0.425263 | 1.608439 | 0.575795  |
| IFI27   | 0.553241 | 0.278584 | 1.09868  | 0.090815  |
| TNC     | 1.184466 | 0.606089 | 2.314774 | 0.620447  |
| ARHGDIB | 0.644484 | 0.327665 | 1.267634 | 0.203074  |
| ID2     | 0.712185 | 0.36443  | 1.391781 | 0.320758  |
| KRT14   | 0.912598 | 0.470287 | 1.770908 | 0.786857  |
| EFHD2   | 0.64788  | 0.329414 | 1.274226 | 0.208485  |

\* $P < 0.05$ .

**Supplementary Table 2. Univariate and multivariate Cox regression analyses of clinical parameters.**

|            | Univariate Cox regression analysis |             |             |              | Multivariate Cox regression analysis |             |             |             |              |
|------------|------------------------------------|-------------|-------------|--------------|--------------------------------------|-------------|-------------|-------------|--------------|
|            | HR                                 | HR 95L      | HR 95H      | P-value      | Coef                                 | HR          | HR 95L      | HR 95H      | P-value      |
| Risk score | 2.145516949                        | 1.588845036 | 2.897225893 | 6.32E-07*    | 0.773546345                          | 2.167439128 | 1.574175931 | 2.98428675  | 2.13E-06*    |
| Gender     | 1.475298614                        | 0.821308281 | 2.650047555 | 0.193179932  |                                      |             | –           |             |              |
| T stage    | 2.812650703                        | 1.578300772 | 5.012355132 | 0.000451474* | 0.985046675                          | 2.677936873 | 1.502513612 | 4.772899118 | 0.000835459* |
| Focal type | 0.912484255                        | 0.520015815 | 1.601158066 | 0.749558197  |                                      |             | –           |             |              |

\* $P < 0.05$

**Supplementary Table 3. The result of GO enrichment analysis.**

| Ontology | ID         | Description                                                        | GeneRatio | BgRatio   | p-value  | p.adjust | q-value  | Count |
|----------|------------|--------------------------------------------------------------------|-----------|-----------|----------|----------|----------|-------|
| BP       | GO:0002377 | Immunoglobulin production                                          | 71/443    | 212/18614 | 2.86E-62 | 9.08E-59 | 8.05E-59 | 71    |
| BP       | GO:0002440 | Production of molecular mediator of immune response                | 75/443    | 328/18614 | 3.46E-52 | 5.49E-49 | 4.86E-49 | 75    |
| BP       | GO:0002768 | Immune response-regulating cell surface receptor signaling pathway | 35/443    | 329/18614 | 1.25E-13 | 1.33E-10 | 1.18E-10 | 35    |
| BP       | GO:0002429 | Immune response-activating cell surface receptor signaling pathway | 33/443    | 302/18614 | 3.03E-13 | 2.40E-10 | 2.13E-10 | 33    |
| BP       | GO:0002757 | Immune response-activating signaling pathway                       | 38/443    | 423/18614 | 2.18E-12 | 1.23E-09 | 1.09E-09 | 38    |
| BP       | GO:0046651 | Lymphocyte proliferation                                           | 32/443    | 306/18614 | 2.33E-12 | 1.23E-09 | 1.09E-09 | 32    |
| BP       | GO:0070661 | Leukocyte proliferation                                            | 34/443    | 348/18614 | 3.23E-12 | 1.34E-09 | 1.19E-09 | 34    |

|    |            |                                                    |        |           |             |             |             |    |
|----|------------|----------------------------------------------------|--------|-----------|-------------|-------------|-------------|----|
| BP | GO:0002764 | Immune response-regulating signaling pathway       | 39/443 | 450/18614 | 3.38E-12    | 1.34E-09    | 1.19E-09    | 39 |
| BP | GO:0032943 | Mononuclear cell proliferation                     | 32/443 | 313/18614 | 4.28E-12    | 1.51E-09    | 1.34E-09    | 32 |
| BP | GO:0030098 | Lymphocyte differentiation                         | 37/443 | 422/18614 | 8.87E-12    | 2.81E-09    | 2.49E-09    | 37 |
| BP | GO:0002253 | Activation of immune response                      | 40/443 | 495/18614 | 1.58E-11    | 4.54E-09    | 4.03E-09    | 40 |
| BP | GO:0050863 | Regulation of T cell activation                    | 34/443 | 377/18614 | 2.97E-11    | 7.86E-09    | 6.97E-09    | 34 |
| BP | GO:1903131 | Mononuclear cell differentiation                   | 38/443 | 474/18614 | 6.58E-11    | 1.60E-08    | 1.42E-08    | 38 |
| BP | GO:0050851 | Antigen receptor-mediated signaling pathway        | 24/443 | 201/18614 | 8.87E-11    | 2.01E-08    | 1.78E-08    | 24 |
| BP | GO:0002449 | Lymphocyte mediated immunity                       | 29/443 | 300/18614 | 1.72E-10    | 3.64E-08    | 3.22E-08    | 29 |
| CC | GO:0019814 | Immunoglobulin complex                             | 64/484 | 108/19518 | 3.77E-75    | 1.11E-72    | 1.08E-72    | 64 |
| CC | GO:0042101 | T cell receptor complex                            | 68/484 | 147/19518 | 7.64E-70    | 1.12E-67    | 1.10E-67    | 68 |
| CC | GO:0098802 | Plasma membrane signaling receptor complex         | 72/484 | 319/19518 | 2.97E-48    | 2.90E-46    | 2.84E-46    | 72 |
| CC | GO:0009897 | External side of plasma membrane                   | 78/484 | 426/19518 | 3.79E-45    | 2.77E-43    | 2.72E-43    | 78 |
| CC | GO:0042105 | Alpha-beta T cell receptor complex                 | 4/484  | 12/19518  | 0.000157807 | 0.009247507 | 0.009069766 | 4  |
| CC | GO:0001533 | Cornified envelope                                 | 7/484  | 59/19518  | 0.000618179 | 0.030187746 | 0.029607525 | 7  |
| CC | GO:0072562 | Blood microparticle                                | 11/484 | 144/19518 | 0.000942559 | 0.039452845 | 0.038694546 | 11 |
| MF | GO:0003823 | Antigen binding                                    | 41/348 | 118/18369 | 5.80E-41    | 2.50E-38    | 2.28E-38    | 41 |
| MF | GO:0005125 | Cytokine activity                                  | 22/348 | 235/18369 | 7.94E-10    | 1.71E-07    | 1.56E-07    | 22 |
| MF | GO:0005126 | Cytokine receptor binding                          | 22/348 | 270/18369 | 1.06E-08    | 1.52E-06    | 1.39E-06    | 22 |
| MF | GO:0008009 | Chemokine activity                                 | 9/348  | 49/18369  | 2.99E-07    | 2.66E-05    | 2.42E-05    | 9  |
| MF | GO:0048018 | Receptor ligand activity                           | 28/348 | 497/18369 | 3.08E-07    | 2.66E-05    | 2.42E-05    | 28 |
| MF | GO:0140375 | Immune receptor activity                           | 13/348 | 141/18369 | 2.89E-06    | 0.000208288 | 0.000189814 | 13 |
| MF | GO:0042605 | Peptide antigen binding                            | 7/348  | 39/18369  | 7.53E-06    | 0.000464576 | 0.000423371 | 7  |
| MF | GO:0042379 | Chemokine receptor binding                         | 9/348  | 74/18369  | 1.06E-05    | 0.000572551 | 0.000521769 | 9  |
| MF | GO:0005164 | Tumor necrosis factor receptor binding             | 6/348  | 30/18369  | 1.79E-05    | 0.000859425 | 0.000783199 | 6  |
| MF | GO:0015026 | Coreceptor activity                                | 7/348  | 48/18369  | 3.11E-05    | 0.001222713 | 0.001114266 | 7  |
| MF | GO:0032813 | Tumor necrosis factor receptor superfamily binding | 7/348  | 48/18369  | 3.11E-05    | 0.001222713 | 0.001114266 | 7  |
| MF | GO:0004222 | Metalloendopeptidase activity                      | 10/348 | 122/18369 | 0.000110295 | 0.00397062  | 0.00361845  | 10 |
| MF | GO:0042287 | MHC protein binding                                | 6/348  | 42/18369  | 0.000130633 | 0.00416982  | 0.003799983 | 6  |
| MF | GO:0001664 | G protein-coupled receptor binding                 | 16/348 | 289/18369 | 0.000135133 | 0.00416982  | 0.003799983 | 16 |
| MF | GO:0045236 | CXCR chemokine receptor binding                    | 4/348  | 18/18369  | 0.000313967 | 0.00904225  | 0.008240257 | 4  |

**Supplementary Table 4. The result of KEGG enrichment analysis.**

| ID       | Description                                                   | GeneRatio | BgRatio  | p-value  | p.adjust | q-value  | Count |
|----------|---------------------------------------------------------------|-----------|----------|----------|----------|----------|-------|
| hsa04060 | Cytokine-cytokine receptor interaction                        | 29/153    | 297/8622 | 3.21E-14 | 6.92E-12 | 6.28E-12 | 29    |
| hsa04061 | Viral protein interaction with cytokine and cytokine receptor | 16/153    | 100/8622 | 1.64E-11 | 1.77E-09 | 1.61E-09 | 16    |
| hsa05340 | Primary immunodeficiency                                      | 10/153    | 38/8622  | 7.12E-10 | 5.12E-08 | 4.65E-08 | 10    |

|          |                                              |        |          |             |             |             |    |
|----------|----------------------------------------------|--------|----------|-------------|-------------|-------------|----|
| hsa04640 | Hematopoietic cell lineage                   | 12/153 | 99/8622  | 1.55E-07    | 8.37E-06    | 7.58E-06    | 12 |
| hsa04062 | Chemokine signaling pathway                  | 15/153 | 192/8622 | 1.43E-06    | 6.16E-05    | 5.59E-05    | 15 |
| hsa04672 | Intestinal immune network for IgA production | 8/153  | 49/8622  | 1.99E-06    | 7.17E-05    | 6.50E-05    | 8  |
| hsa05330 | Allograft rejection                          | 7/153  | 38/8622  | 3.84E-06    | 0.000118548 | 0.000107455 | 7  |
| hsa05323 | Rheumatoid arthritis                         | 10/153 | 93/8622  | 5.28E-06    | 0.000142496 | 0.000129163 | 10 |
| hsa04660 | T cell receptor signaling pathway            | 11/153 | 121/8622 | 9.16E-06    | 0.000219757 | 0.000199195 | 11 |
| hsa04064 | NF-kappa B signaling pathway                 | 9/153  | 104/8622 | 9.01E-05    | 0.001946043 | 0.001763957 | 9  |
| hsa04940 | Type I diabetes mellitus                     | 6/153  | 43/8622  | 0.000100335 | 0.00197022  | 0.001785872 | 6  |
| hsa04514 | Cell adhesion molecules                      | 11/153 | 158/8622 | 0.000109874 | 0.001977739 | 0.001792687 | 11 |
| hsa05144 | Malaria                                      | 6/153  | 50/8622  | 0.000236127 | 0.003868426 | 0.003506468 | 6  |
| hsa04657 | IL-17 signaling pathway                      | 8/153  | 94/8622  | 0.000250731 | 0.003868426 | 0.003506468 | 8  |
| hsa05320 | Autoimmune thyroid disease                   | 6/153  | 53/8622  | 0.000326537 | 0.004702139 | 0.004262173 | 6  |
| hsa05332 | Graft-versus-host disease                    | 5/153  | 42/8622  | 0.000825575 | 0.011145267 | 0.010102435 | 5  |
| hsa05321 | Inflammatory bowel disease                   | 6/153  | 65/8622  | 0.000986645 | 0.012536201 | 0.011363224 | 6  |
| hsa04650 | Natural killer cell mediated cytotoxicity    | 8/153  | 132/8622 | 0.002355524 | 0.028266288 | 0.025621489 | 8  |
| hsa04662 | B cell receptor signaling pathway            | 6/153  | 84/8622  | 0.003687196 | 0.041917599 | 0.037995484 | 6  |
| hsa05143 | African trypanosomiasis                      | 4/153  | 37/8622  | 0.003993356 | 0.041933578 | 0.038009969 | 4  |
| hsa04668 | TNF signaling pathway                        | 7/153  | 114/8622 | 0.004076876 | 0.041933578 | 0.038009969 | 7  |
